# Supplementary material for: Triboelectric nanogenerators with groove textures and carbon fillers for self-powered cathodic protection
Source: Royal Society of Chemistry journal article supplement (doi:10.1039/d4nr03126a), 2024-01-01
Supplement: d4nr03126a1.pdf [file d4nr03126a1.pdf]

## Supporting information

### **Triboelectric nanogenerator with groove textures and carbon- fillers for self-powered cathodic protection**

Weixu Yang<sup>a,b,\*</sup>, Zepeng Ma<sup>a</sup>, Suqing Yang<sup>a</sup>, Yanqiang Hu<sup>c</sup>, Lu Zhang<sup>d</sup>

<sup>a</sup> Department of Mechanical Engineering, University of Science and Technology Beijing, Beijing  
100083, China

<sup>b</sup> Shunde Innovation School, University of Science and Technology Beijing, Foshan 528399,  
China

<sup>c</sup> Beijing Key Laboratory of Long-life Technology of Precise Rotation and Transmission  
mechanisms, Beijing Institute of Control Engineering, Beijing 100094, China

\* Corresponding author

E-mail: yangweixu@ustb.edu.cn

Variation of open-circuit voltage of CS-TENG with carbon fiber mass fraction under texture sizes of  $15\mu\text{m}$ - $15\mu\text{m}$  is illustrated in Fig.S1. As can be seen, with the increase of carbon fiber mass fraction, the open-circuit voltage of CS-TENG first increases and then decreases, reaching a maximum of 102.26 V at a carbon fiber mass fraction of 0.5wt%, which is consistent with that of CS-TENG with under texture sizes of  $10\mu\text{m}$ - $10\mu\text{m}$ .

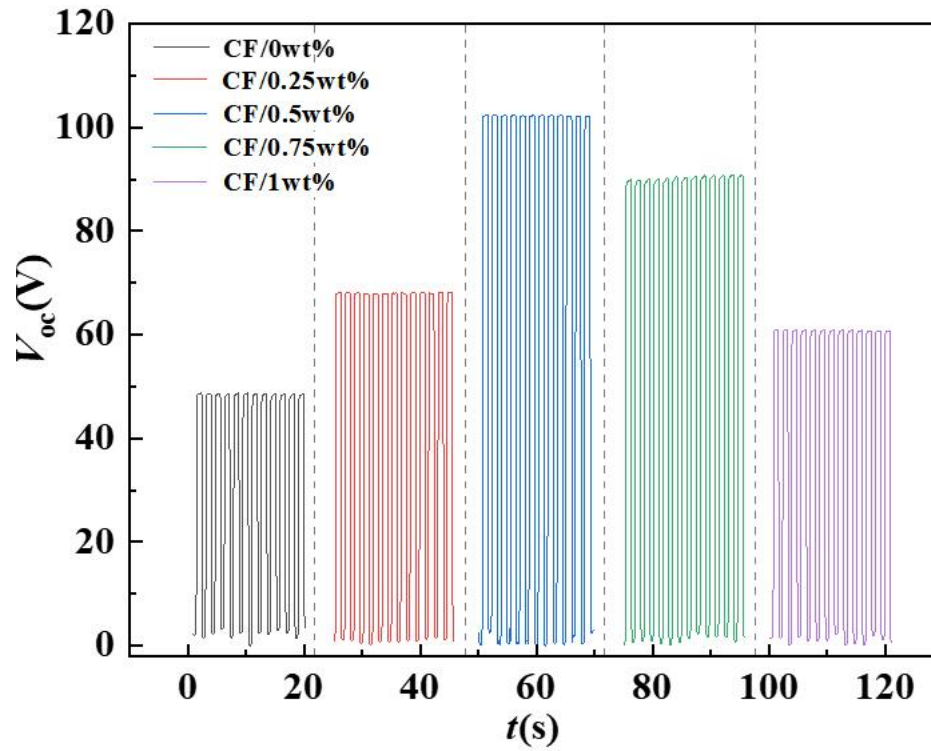

Fig.S1 Open-circuit voltage of CS-TENG with the groove texture size of  $15\mu\text{m}$ - $15\mu\text{m}$  and different mass fractions of carbon fibers.
